# Supplementary material for: Hydrophilic Modification of Multi-Walled Carbon Nanotube for Building Photonic Crystals with Enhanced Color Visibility and Mechanical Strength
Source: MDPI journal article supplement (doi:10.3390/molecules21050547), 2016-04-28
Supplement: s1 [file s1]

# Supplementary Materials: Hydrophilic Modification of Multi-Walled Carbon Nanotube for Building Photonic Crystals with Enhanced Color Visibility and Mechanical Strength

Feihu Li, Bingtao Tang, Jinghai Xiu and Shufen Zhang

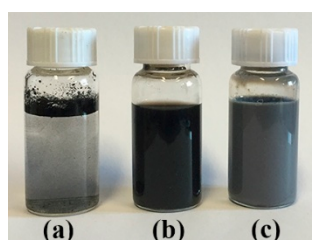

**Figure S1.** Photographs of dispersion behavior of MWCNTs: (a) crude MWCNTs; (b) modified MWCNTs; (c) homogeneous mixtures of PS emulsion doped with modified MWCNTs.

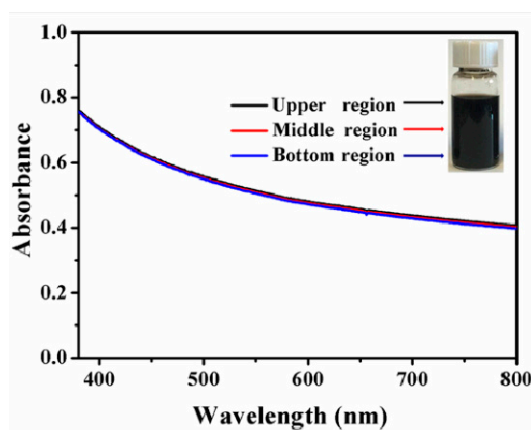

**Figure S2.** UV-Vis spectra of the upper, middle, and bottom of the MWCNTs dispersion.

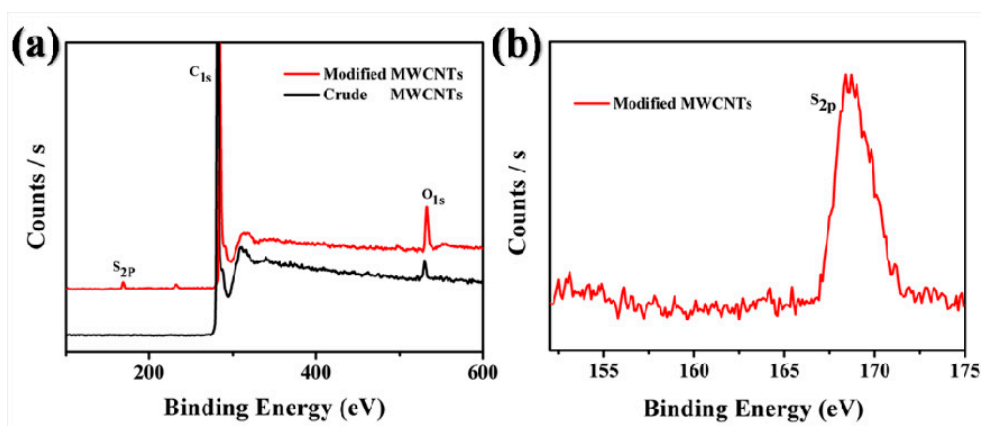

**Figure S3.** (a) XPS spectra of crude and modified MWCNTs; (b) High-resolution XPS spectrum of S<sub>2p</sub> core in modified MWCNTs.

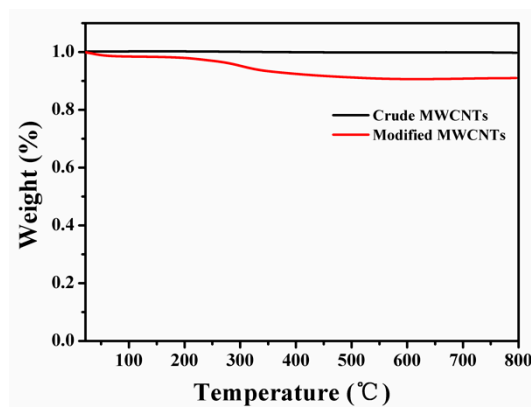

Figure S4. TGA weight loss curves of crude and modified MWCNTs.

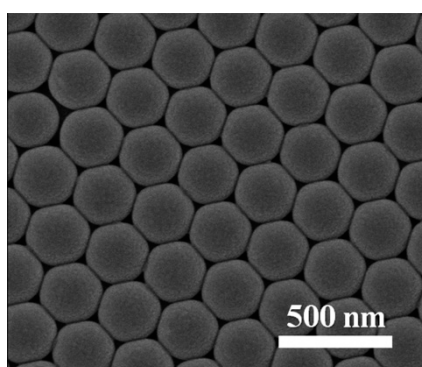

Figure S5. SEM image of pure PS film with hydrodynamic particle size of 317 nm.
